# Supplementary material
Source: publisher figshare collection journal article supplement (https://karger.figshare.com/ndownloader/files/15158060)
Supplement: Supplementary file 1 [file 15158060]

**Table S1.** Inclusion and exclusion criteria for newborn infants with birth asphyxia evolving to hypoxic-ischemic encephalopathy and randomized to topiramate or placebo plus therapeutic hypothermia to control seizure activity based on Shankaran S et al (reference #17).

| **Inclusion criteria**  Gestational age ≥ 36 weeks and a birthweight >2000 g, pH≤7.0 and/or base deficit ≥16mmol/L in umbilical cord or any blood the worse blood gas determination performed during the first 60 minutes after birth (cord blood gases are routinely performed in every delivery).  If blood gas pH was 7.01 to 7.15, a base deficit was between -10 and -15.9 mmol/L or was not available, additional criteria were requested (at least one of A and/or B criteria)  *A. criteria: Existence of perinatal data compatible with perinatal hypoxia ischemia*   - 1. Non-reassuring fetal status during fetal heart monitoring   2. Sentinel events such as: cord prolapse, *abruptio placentae*, uterine rupture, severe maternal and/or fetal hemorrhage, and birth dystocia.   *B. criteria: Objective perinatal evaluation*   - 1. Apgar score ≤ 5 at 10 min.   2. Needing positive pressure ventilation with mask or tracheal tube at 10 minutes after birth.   **Exclusion criteria**   1. Gestational age >36 weeks 2. Patient presents with condition needing acute surgery before discharge 3. Severe congenital malformations and/or chromosomopathies 4. Parents reject to participate/sign inform consent 5. Impossibility of and/or error in randomization |
| --- |

Note: birth was defined as the full expulsion of the entire body of the fetus from the mother.

**Table S2.** Evaluation criteria of Hypoxic Ischemic Encephalopathy according to Shankaran S et al (ref. #17)

| **Category** | **Moderate** | **Severe** |
| --- | --- | --- |
| Level of consciousness | Lethargic | Stupor or coma |
| Spontaneous activity | Decreased activity | No activity |
| Posture | Distal flexion  Complete extension | Decerebrate |
| Tone | Hypotonia (focal or general) | Flaccid |
| Primitive reflexes   - Suck - Moro | - Weak - Incomplete | - Absent - Absent |
| Autonomic System   - Pupils - Heart rate - Respiration | - Constricted - Bradycardia - Periodic breathing | - Deviated, dilated or non-reactive to light - Variable - Apnea |

**Table S3.** Energy-related metabolites and Krebs’ cycle metabolites determined by LC-MS/MS in plasma of asphyctic newborn infants evolving to hypoxic ischemic encephalopathy treated with therapeutic hypothermia and randomized to topiramate or placebo. Results are expressed as median (interquartile range). Values at each time point Topiramate vs. Placebo performed using Wilcoxon signed rank test.

| ENERGY RELATED METABOLITES | | | | | | | | | | | | | | | | | | |
| --- | --- | --- | --- | --- | --- | --- | --- | --- | --- | --- | --- | --- | --- | --- | --- | --- | --- | --- |
|  | Topiramate (µmol/L) | | | | | | | | Placebo (µmol/L) | | | | | | | | | |
| Timing | n | Pyruvate | Lactate | | Aceto-  acetate | | β-Hydroxy  butyrate | | n | | Pyruvate | | Lactate | | Aceto  acetate | | β-Hydroxy  butyrate | |
| 0 h | 21 | 157  (85-194)  p<0.1 | 4509  (2778-8974)  p<0.04 | | 7  (2-15)  p<1.0 | | 13  (9-26)  p<0.9 | | 20 | | 121  (88-143) | | 2486  (1591-5143) | | 8  (4-12) | | 17  (8-22) | |
| 24 h | 25 | 62  (35-123)  p<0.9 | 1301  (1014-1826)  p<0.7 | | 7  (4-30)  p<0.3 | | 12  (6-19)  p<0.8 | | 26 | | 59  (42-96) | | 1534  (886-2402) | | 8  (1-12) | | 9  (5-20) | |
| 48 h | 25 | 39  (25-92)  p<0.3 | 1012  (739-1461)  p<0.7 | | 6  (2-12)  p<0.3 | | 8  (6-10)  p<0.8 | | 26 | | 51  (29-96) | | 1122  (773-1924) | | 7  (5-15) | | 8  (5-14) | |
| 72 h | 24 | 44  (19-110)  p<0.7 | 1016  (724-1925)  p<0.4 | | 6  (1-12)  p<0.8 | | 7  (5-10)  p<0.5 | | 27 | | 43  (24-63) | | 878  (484-1492) | | 6  (2-9) | | 5  (3-9) | |
| KREBS’ CYCLE METABOLITES | | | | | | | | | | | | | | | | | | |
|  | Topiramate (µmol/L) | | | | | | | | | Placebo (µmol/L) | | | | | | | | |
|  | n | Succinate | | Fumarate | | Malate | | α-Keto-glutarate | | n | | Succinate | | Fumarate | | Malate | | α-Keto-glutarate |
| 0 h | 21 | 0.5  (0.3-0.9)  p<0.2 | | 0.7  (0.5-0.9)  p<0.5 | | 1.3  (1.1-2)  p<1.0 | | 0.9  (0.4-2)  p<0.8 | | 20 | | 0.3  (0.12-0.4) | | 0.6  (0.5-0.8) | | 1.3  (0.7-4) | | 1.3  (0.4-2) |
| 24 h | 25 | 0.3  (0.11-0.5)  p<0.5 | | 0.6  (0.3-0.9)  p<0.6 | | 2.1  (1.0-3)  p<0.4 | | 0.5  (0.02-1.0)  p<0.3 | | 26 | | 0.4  (0.2-0.5) | | 0.6  (0.3-0.8) | | 2  (1.0-2) | | 0.7  (0.2-1.5) |
| 48 h | 25 | 0.4  (0.2-0.6)  p<0.8 | | 0.7  (0.5-1.2)  p<0.1 | | 3.0  (1.4-3)  p<0.4 | | 0.3  (0.02-1.3)  p<0.02 | | 26 | | 0.5  (0.3-0.7) | | 0.6  (0.4-1.0) | | 2  (1.4-3) | | 1.1  (0.5-1.4) |
| 72 h | 24 | 0.5  (0.15-0.7)  p<0.5 | | 0.8  (0.5-1.2)  p<0.8 | | 2  (1.5-3)  p<0.7 | | 1.0  (0.02-1.3)  p<0.7 | | 27 | | 0.4  (0.2-0.5) | | 0.6  (0.4-0.9) | | 2  (2-2) | | 0.6  (0.3-1.4) |


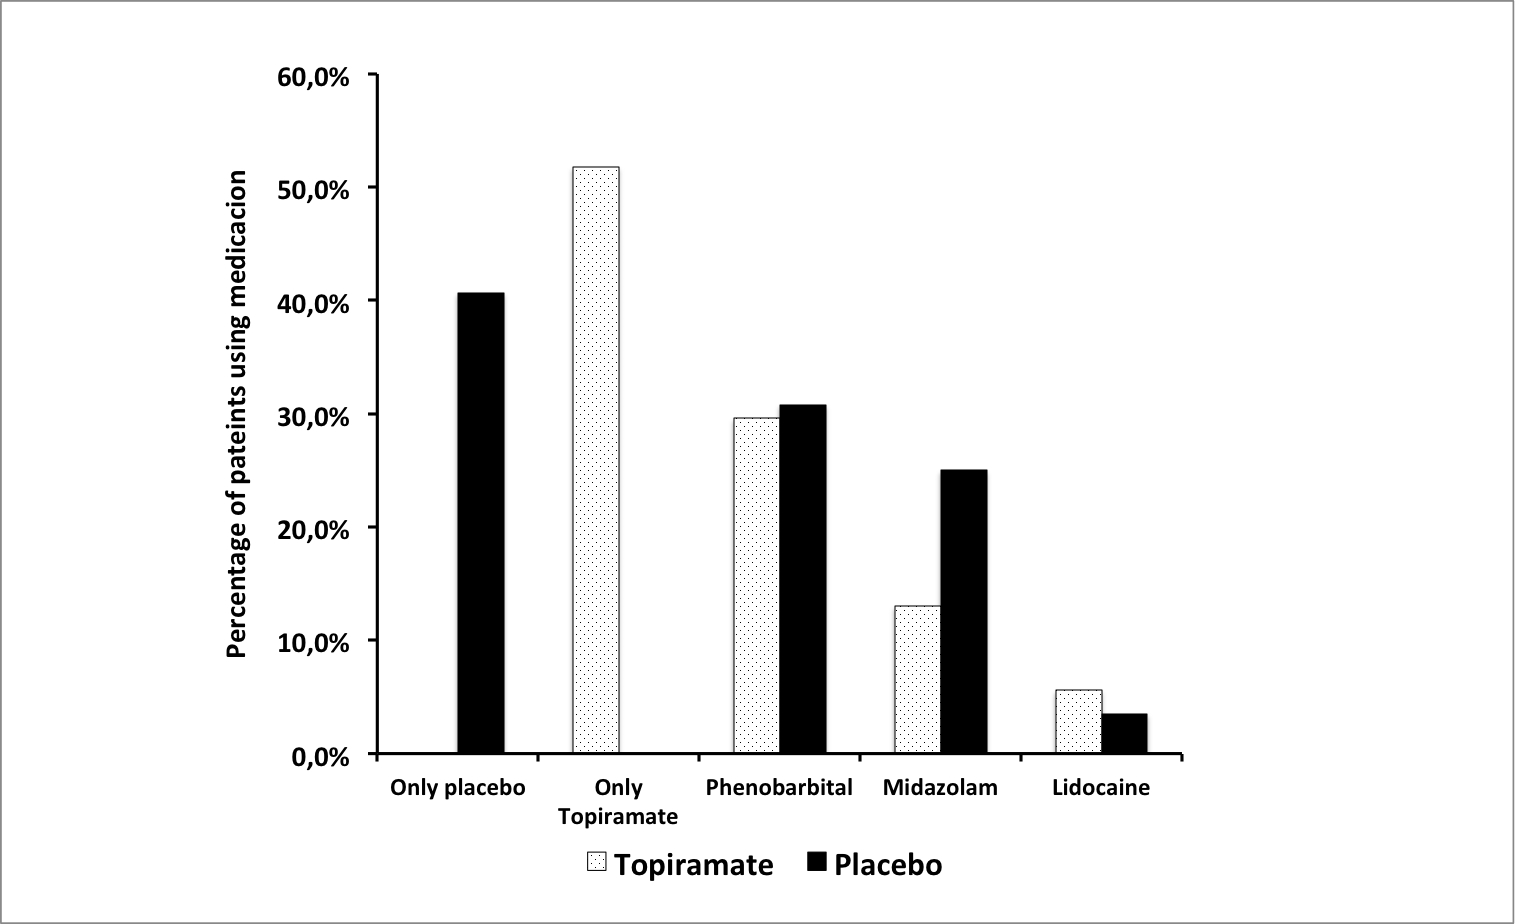


**Figure S1.** Depicts the percentage of patients that needed additional medication according to their response to initial therapy. The order in which additional medication was administered was first phenobarbital, second midazolam and last lidocaine. No significant differences regarding the use of additional medication to control seizures were assessed.


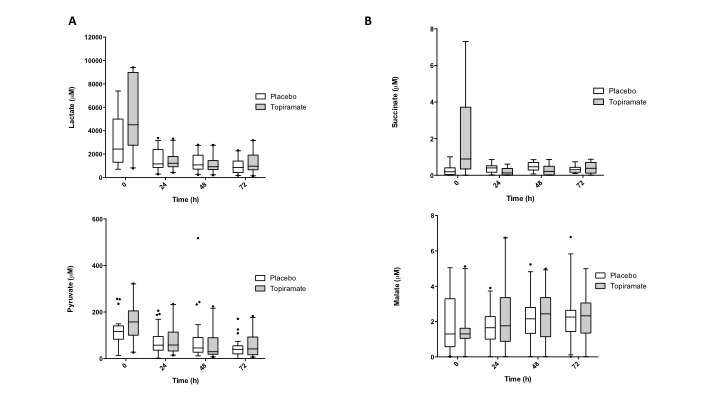


**Figure S2.** Representation of median (CI 25%-75%) plasma values of energy-related metabolites (panel A) and Krebs’ cycle metabolites (panel B). Initial elevation of metabolites and enzymes reflects the metabolic response to tissue hypoxia secondary to anaerobic metabolism. After the initiation of cooling metabolites’ values stabilized revealing the effectiveness of therapeutic hypothermia.


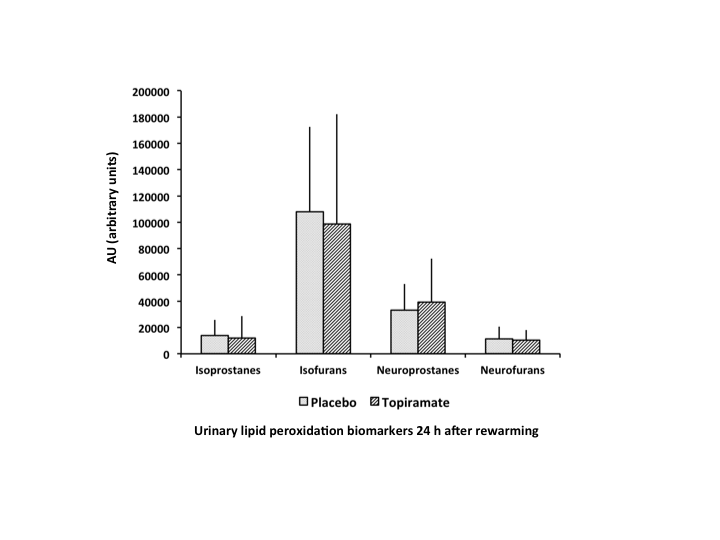


**Figure S3.** Representation of mean (standard deviation) of lipid peroxidation metabolites isoprostanes and isofurans, and specific brain lipid peroxidation neuroprostanes and neurofurans in newborn infants with hypoxic ischemic encephalopathy treated with therapeutic hypothermia and randomized to topiramate or placebo. No significant differences between both groups for any of the biomarkers were found.
